1 **Primary series and booster COVID-19 vaccine effectiveness in a cohort of healthcare workers in**  
2 **Albania during a BA.1 and BA.2 variant period, January – May 2022**

3 **Authors:** Iris Finci<sup>1\*</sup>, Madelyn Yiseth Rojas Castro<sup>2\*</sup>, Iris Hasibra<sup>3</sup>, Jonilda Sulo<sup>4,5</sup>, Albana Fico<sup>3</sup>, Rovena  
4 Daja<sup>3</sup>, Adela Vasili<sup>3</sup>, Majlinda Kota<sup>3</sup>, Iria Preza<sup>6</sup>, Barbara Mühlemann<sup>7,8</sup>, Christian Drosten<sup>7,8</sup>, Richard  
5 Pebody<sup>1</sup>, Kathryn E. Lafond<sup>9</sup>, Esther Kissling<sup>2</sup>, Mark A. Katz<sup>1</sup>, Silvia Bino<sup>3,4</sup>

6 <sup>1</sup>World Health Organization Regional Office for Europe, Copenhagen, Denmark

7 <sup>2</sup>Epiconcept, Paris, France

8 <sup>3</sup>Institute of Public Health, Tirana, Albania

9 <sup>4</sup>Southeast European Center for Surveillance and Control of Infectious Disease, Tirana, Albania

10 <sup>5</sup>Mediterranean and Black Sea Programme in Intervention Epidemiology Training (MediPIET), European  
11 Centre for Disease Prevention and Control (ECDC), Solna, Sweden

12 <sup>6</sup>World Health Organization, Country Office Albania, Tirana, Albania

13 <sup>7</sup>Institute of Virology, Charité–Universitätsmedizin Berlin, corporate member of Freie Universität Berlin,  
14 Humboldt- Universität zu Berlin, and Berlin Institute of Health, 10117 Berlin, Germany

15 <sup>8</sup>German Centre for Infection Research (DZIF), partner site Charité, 10117 Berlin, Germany

16 <sup>9</sup>Influenza Division, US Centers for Disease Control, Atlanta, Georgia

17 \*These authors contributed equally

18

19 Corresponding author:

20 Silvia Bino, MD, PhD

21 [silviabino@gmail.com](mailto:silviabino@gmail.com)

22

23 Abstract word count: 242

24 Manuscript word count: 3447

25 **Abstract**

26 *Background*

27 Healthcare workers (HCWs) have experienced high rates of COVID-19 morbidity and mortality. We  
28 estimated COVID-19 two-dose primary series and monovalent booster vaccine effectiveness (VE) against  
29 symptomatic SARS-CoV-2 Omicron (BA.1 and BA.2) infection among HCWs in three Albanian hospitals  
30 during January–May 2022.

31

32 *Methods*

33 Study participants completed weekly symptom questionnaires, underwent PCR testing when  
34 symptomatic, and provided quarterly blood samples for serology. We estimated VE using Cox regression  
35 models (1-hazard ratio), with vaccination status as the time-varying exposure and unvaccinated HCWs as  
36 the reference group, adjusting for potential confounders: age, sex, prior SARS-CoV-2 infection (detected  
37 by PCR, rapid-antigen test or serology), and household size.

38

39 *Results*

40 At the start of the analysis period, 76% of 1,462 HCWs had received a primary series, 10% had received a  
41 booster dose, and 9% were unvaccinated; 1,307 (89%) HCWs had evidence of prior infection. Overall,  
42 86% of primary series and 98% of booster doses received were BNT162b2. The median time interval  
43 from the second dose and the booster dose to the start of the analysis period was 289 days (IQR:210–  
44 292) and 30 days (IQR:22–46), respectively. VE against symptomatic PCR-confirmed infection was 34%  
45 (95%CI: -36;68) for the primary series and 88% (95%CI: 38;98) for the booster.

46

47 *Conclusions*

48 Among Albanian HCWs, most of whom had been previously infected, COVID-19 booster dose offered  
49 improved VE during a period of Omicron BA.1 and BA.2 circulation. Our findings support promoting  
50 booster dose uptake among Albanian HCWs, which, as of January 2023, was only 20%.

51

52

53

## 54 Introduction

55 Healthcare workers (HCWs) have suffered considerable morbidity and mortality during the COVID-19  
56 pandemic<sup>1,2</sup>. Vaccinating HCWs against COVID-19 decreases COVID-19-related illness and absenteeism  
57 and therefore helps to maintain a functioning health care workforce during periods of high burden on  
58 health systems. Additionally, vaccinating HCWs can potentially reduce onward SARS-CoV-2  
59 transmission<sup>3</sup>. Understanding COVID-19 vaccine effectiveness (VE) among HCWs is critical to inform  
60 optimal vaccination policies.

61 As of February 2023, in the European Region of the World Health Organization (WHO), primary series  
62 and booster COVID-19 vaccine uptake among HCWs was considerably lower in the 5/19 middle-income  
63 countries (MICs) that reported data to WHO (66% and 27%, respectively) compared to the 20/34 high  
64 income countries (HICs) that reported (82% and 59%, respectively)<sup>4</sup>.

65 Few COVID-19 VE studies have been reported in MICs in Europe or globally, particularly during periods  
66 of Omicron circulation<sup>5</sup>. Differences in population health and demographics, differences in health  
67 systems and time of access to COVID-19 vaccines between HICs and MICs may variably impact vaccine  
68 performance, underscoring the need for VE studies in MICs to guide policy<sup>6</sup>. Furthermore, local data  
69 demonstrating positive VE estimates can be helpful in promoting vaccine uptake in countries where  
70 vaccine acceptance is low.

71 In early 2022, the spread of SARS-CoV-2 Omicron, a variant with higher transmissibility compared to  
72 previous variants<sup>7</sup>, led to elevated pressure on healthcare systems across Europe, and many infected  
73 HCWs missed work<sup>8</sup>. To date, studies of COVID-19 VE against Omicron, mostly from HICs<sup>9</sup>, have shown  
74 sustained moderate to high primary series VE against severe disease (76% within 6 months after the last

75 dose) but much lower VE against milder symptomatic infection (35% within 6 months after last dose)<sup>10</sup>;  
76 however, VE estimates against mild infection increased to 62%<sup>11</sup> and 71%<sup>10</sup> following booster doses.

77 In Albania, an upper-MIC of 2.8 million inhabitants in Southeast Europe, COVID-19 vaccination with  
78 BNT162b2 (Comirnaty, Pfizer-BioNTech) started on 11 January 2021, and HCWs were a high-priority  
79 group for vaccination. Additionally, ChAdOx1-S (Vaxzervria, AstraZeneca) and CoronaVac (Sinovac Life  
80 Sciences) were introduced in mid-March 2021. On 15 October 2021, the Albanian National Technical  
81 Advisory Group for Immunizations recommended a booster vaccine for all HCWs who had completed  
82 their primary series at least six months prior. As of 31 January 2023, while most Albanian HCWs (83%)  
83 had received primary series vaccine, only 20% had received a booster (third) dose<sup>4</sup>.

84 In February 2021, we established a cohort of HCWs in Albania to prospectively monitor COVID-19 VE  
85 against SARS-CoV-2 infection<sup>12-14</sup>. In this analysis, we evaluated primary series and booster dose VE  
86 against SARS-CoV-2 infection during BA.1 and BA.2 Omicron period.

## 87 **Methods**

### 88 *Study Design*

89 We conducted an interim analysis of an ongoing prospective cohort study that started in February 2021.  
90 Our objective was to estimate VE of COVID-19 primary vaccine series and booster dose against  
91 symptomatic and asymptomatic SARS-CoV-2 infection among HCWs at three hospitals in Albania, from  
92 January through May 2022. Study methods and early primary series VE results have been previously  
93 published<sup>12,14</sup>.

### 94 *Data Collection*

95 At enrolment (February–May 2021), participants completed a questionnaire that included questions  
96 about demographics, health status, hospital role and prior COVID-19 vaccination. During the study,  
97 participants completed weekly symptom questionnaires; participants who reported having any  
98 symptom included in the Albanian MOH COVID-19 case definition<sup>12</sup> provided a nasopharyngeal  
99 specimen that was tested for SARS-CoV-2 by RT-PCR at the Institute of Public Health Laboratory in  
100 Tirana, Albania.

101 Study staff cross-checked the Albanian National Surveillance of Infectious Diseases Electronic  
102 Information System (SISI) to identify any PCR or rapid antigen tests (RATs) performed in laboratories and  
103 hospitals outside of the study, and entered these data into the study database. Self-tested RAT results  
104 were not recorded. Participants who tested positive for SARS-CoV-2 by PCR or RAT were administered a  
105 follow-up questionnaire about their course of illness 30 days after their positive test. Study staff verified  
106 participants' COVID-19 vaccination status through the national integrated immunization information  
107 system (IIS) and the family care physicians web-based medical data system (E-vizita). All study data were  
108 entered securely and stored in REDCap<sup>15</sup>.

#### 109 *Laboratory procedures*

110 We collected blood specimens from participants at enrolment and then every three months throughout  
111 the study. Specimens were tested for total anti-nucleocapsid antibody using the Platelia SARS-CoV-2  
112 Total Antibody Assay (Bio-Rad Laboratories, Hercules, CA). Cut-off values were determined according to  
113 instructions from the package insert

114 PCR-positive specimens were sent to the Institute of Virology – Charité (Berlin, Germany), where a  
115 representative subset of specimens based on dates and location and cycle threshold value below 24 was

116 selected to undergo whole genome sequencing (WGS). We also inspected Albanian molecular  
117 surveillance data from the Global Initiative on Sharing All Influenza Data (GISAID)<sup>16</sup>.

118

### 119 *Vaccine effectiveness analysis*

120 We measured primary series and booster dose VE compared to unvaccinated participants. Additionally,  
121 we measured the relative VE (rVE) of booster dose, comparing HCWs who received primary series and  
122 booster dose vaccination with HCWs who received primary series alone. For both VE and rVE, the  
123 primary analytic outcome was PCR-confirmed symptomatic SARS-CoV-2 infection. For the booster dose  
124 VE analyses, HCWs started contributing person-time only when they were eligible to receive the booster  
125 dose. We also measured VE against two secondary outcomes: an outcome of any PCR- or RAT-confirmed  
126 symptomatic SARS-CoV-2 infection, , and a combined outcome of symptomatic and asymptomatic SARS-  
127 CoV-2 infection, confirmed by one of three tests: PCR, RAT, and/or seroconversion. Because inactivated  
128 vaccines can produce anti-nucleocapsid antibodies, we excluded participants who received CoronaVac  
129 from the analysis that included seroconversion as an endpoint. We defined a symptomatic SARS-CoV-2  
130 infection as a participant with symptom onset between 14 days before and 4 days after the collection  
131 date of a SARS-CoV-2-positive swab. We defined seroconversion as a positive anti-nucleocapsid antibody  
132 test preceded by a negative anti-nucleocapsid antibody test 3 months earlier.

133 For participants who seroconverted without having a positive PCR test or RAT, we estimated the date of  
134 infection using two approaches; for participants who reported symptoms on their weekly questionnaire  
135 during the period of seroconversion, the inferred date of infection was the date of symptom onset. For  
136 those without reported symptoms, we estimated the date of infection as the mid-point between the last  
137 negative serological test and the date three weeks before the subsequent positive serological test<sup>17</sup>.

138 We defined prior infection as a history of a positive PCR test, RAT or anti-nucleocapsid serology test at  
139 the start of the analysis period. For each analysis described above, we also conducted stratified analyses  
140 to evaluate VE among participants who did and did not have evidence of previous SARS-CoV-2 infection  
141 at any point before the study start. We also assessed the combined protective effect of vaccination and  
142 prior SARS-CoV-2 infection using four levels of exposures: (i) primary series and no prior infection  
143 (reference group), (ii) primary series and prior infection, (iii) booster vaccination without prior infection  
144 and (iv) booster vaccination and prior infection. Finally, we assessed the impact of time since vaccination  
145 on VE of primary series vaccination compared to unvaccinated.

146

#### 147 *Statistical model*

148 We used Cox proportional hazards models to estimate VE as  $(1 - \text{adjusted hazard ratio}) * 100$ ; therefore all  
149 reported VE estimates are adjusted. Vaccination was a time-varying exposure as vaccination status could  
150 have changed over time. Thus, the same participant could contribute person-time to more than one  
151 exposure category. Calendar time was used as the underlying time in the Cox regression. We used the  
152 Schoenfeld residual test to check the proportional hazard assumption. All analyses were performed  
153 using R software<sup>18</sup>.

154 We calculated unadjusted and adjusted hazard ratio (HR) and estimated VE, including hospital as a fixed  
155 effect to account for the multi-site design. We considered the following *a priori* covariates to be added  
156 in the multivariable regression model: previous infection, age, sex, household size, any chronic  
157 condition. We included the aforementioned confounders that changed the VE estimate by more than  
158 5%. Person-time contribution started either on January 1, 2022 or from the start of time at risk for those  
159 with prior SARS-CoV-2 infection (90 days after positive test or inferred infection date); it ended at the  
160 first occurrence of any of the following events: 1) the day of the SARS-CoV-2 infection, 2) the day of the

161 last weekly questionnaire before complete loss to follow-up, 3) the day of withdrawal from the study, or  
162 4) the censor date for the analysis period (31 May 2022). Participants who received a second or third  
163 vaccine dose were excluded for 14 days, after which they were considered to be fully immunized with  
164 their respective dose and added to the corresponding exposure category. Person-time of participants  
165 vaccinated with only one dose was excluded from the analysis. For the secondary analysis that included  
166 seroconversion as an outcome, person-time also ended on the day of the last serological result or  
167 receipt of an inactivated vaccine. We also performed two sensitivity analyses (Supplemental  
168 information).

#### 169 *Ethical considerations*

170 The study protocol was approved by the WHO Research Ethics Review Committee (ERC) (reference  
171 number CERC.0097A) and the Albania IPH ERC (reference number 156). This activity was determined to  
172 meet the requirements of public health surveillance as defined in 45 CFR 46.102(l) (2) (CDC reference  
173 number 0900f3eb81ce0ede). All participants provided written informed consent. The study is registered  
174 with [clinicaltrials.gov](https://clinicaltrials.gov) (Identifier NCT04811391).

## 175 **Results**

### 176 *Descriptive characteristics*

177 During the analysis period, 1 January – 31 May 2022, 1,462 of the initial 1,504 HCWs (97%) were still  
178 enrolled in the study and were included in the analysis. At the start of the follow-up, the median age  
179 was 44 years (IQR:34–53), and 1,151 (79%) were female. Overall, 691 (47%) were nurses or midwives,  
180 297 (20%) were physicians, 194 (13%) were janitorial staff or food workers, and 280 (19%) had other  
181 professions (Table 1). At analysis period start, 1,112 (76%) HCWs had received the primary vaccine series  
182 only, 146 (10%) had received a booster dose (third dose), 69 (5%) had received one dose, and 135 (9%)



183 were unvaccinated. Altogether, 959/1,112 (86%) of primary vaccine series were BNT162b2 (Comirnaty,  
184 Pfizer-BioNTech), 137 (9%) ChAdOx1-S (Vaxzervria, AstraZeneca) and 11 (1%) CoronaVac (Sinovac Life  
185 Sciences). Overall, 143/146 (98%) booster doses were BNT162b2. The median time since receiving the  
186 second dose until the start of the analysis period was 289 days (IQR: 210–292 days); for the booster  
187 dose, it was 30 days (IQR: 22–45 days) (Figure S2). At analysis start, 1,307 (89%) HCWs had evidence of  
188 prior infection, of whom 115 (11%) were infected in the previous 3 months, 836 (57%) were infected 3-  
189 12 months earlier, and 356 (24%) were infected more than 12 months prior (Table 1). At the analysis  
190 period end, 1070 (73%) participants had received primary series vaccine only, 247 (17%) participants  
191 had received a booster dose, 98 (7%) remained unvaccinated and 47 (3%) received only one dose (Table  
192 S1). No participants received a second booster dose during the study period. Most booster doses  
193 [244/247 (98%)] were BNT162b2, and nearly all participants who received a booster [227/247 (92%)]  
194 had received primary series BNT162b2.

195 Unvaccinated HCWs were younger (median age: 35 years) and included more females (89%) compared  
196 to HCWs that received either a primary vaccine series (median age: 44 years and 80% female) or a  
197 booster dose (median age: 51 years and 57% female). Compared to HCWs who received a primary  
198 vaccine series only, boosted HCWs were older (median age: 51 years versus 44 years), more often male  
199 (43% versus 20%), had a greater proportion with chronic conditions (28% versus 20%), were more often  
200 physicians (56% versus 17%) and were less previously infected (80% versus 90%) (Table 1).

201

## 202 *Outcomes*

203 The completion rate of the weekly symptom questionnaire was 89% during the follow-up period.  
204 Overall, 167 participants reported symptomatic episodes during the study period; two participants

205 reported two symptomatic episodes,  $\geq 30$  days apart. All participants who reported symptoms had a  
206 SARS-CoV-2 PCR or RAT test performed; 104 were positive (94 by PCR and 10 by RAT), and 63  
207 participants were negative by PCR or RAT. Among participants included in the analysis, 86 had  
208 symptomatic SARS-CoV-2 infections and 107 had asymptomatic infections (55%) (Figure 1B). Of the 86  
209 symptomatic infections, 76 were detected by PCR and 10 by RAT. Of the symptomatic infections, 12  
210 were among unvaccinated participants, 70 were in participants who had received primary vaccine series,  
211 and four were in participants who had received a booster dose (Figure 1A). Most of the 107  
212 asymptomatic infections (101 (94%)) were detected through seroconversion (Figure 1B). Combining  
213 symptomatic and asymptomatic infections, there were a total of 19 infections among unvaccinated  
214 participants, 156 infections in participants with primary vaccine series, and 18 infections in participants  
215 who received a booster dose. Almost all symptomatic infections [85/86 (99%)] occurred in January and  
216 February, a period when Omicron BA.1 and BA.2 were circulating in Albania (Figure S1B). Overall, 17  
217 (22%) samples underwent genomic sequencing, of which 16 (94%) were of BA.1 or BA.2 Omicron  
218 sublineage. BA.1 and BA.2 sublineages accounted for more than 96% of sequenced samples from  
219 Albania reported to GISAID in January and February 2022<sup>16</sup> (Figure S1B).

220

#### 221 *VE against symptomatic PCR- or RAT-confirmed SARS-CoV-2 infection*

222 VE against symptomatic PCR-confirmed SARS-CoV-2 infection was 34% (95% CI -36;68) for primary  
223 vaccine series overall and 26% (95% CI -53;64) for BNT162b2 primary vaccine series (Table 2, Figure 2).  
224 Among HCWs with evidence of prior infection, VE of any primary series was 18% (95% CI -83;63) (Table  
225 S2). Booster dose VE, compared to unvaccinated HCWs, was 88% (95% CI 39;98) overall and 88% (95% CI  
226 38;98) for participants who had received a BNT162b2 booster. The rVE of a booster dose compared to  
227 primary series was 57% (95% CI -25;85) for any booster and 56% (95% CI -28;85) for BNT162b2 boosters

228 compared to BNT162b2 primary series. VE estimates against the combined endpoint of symptomatic  
229 PCR- or RAT-confirmed infection were slightly higher with narrower confidence intervals (Figure 2, Table  
230 2). We could not stratify booster VE according to prior infection status due to the small number of  
231 events.

### 232 *VE against any (asymptomatic and symptomatic) SARS-CoV-2 infection*

233 Primary series VE against any SARS-CoV-2 infection was 19% (95% CI -34;51) overall and 17% (95% CI  
234 38;50) for BNT162b2 only. Booster dose VE was 70% (95% CI 19;89) overall and 71% (95% CI 18;90) for  
235 BNT162b2 only. (Table 2, Figure 2). Among participants eligible for booster vaccination, the rVE of any  
236 first booster dose against any SARS-CoV-2 infection was 36% (95% CI -7;62) and the rVE of BNT162b2  
237 booster compared to BNT162b2 primary series was 30% (95% CI -18;59).

238 Compared to HCWs who received the primary vaccine series and had no evidence of prior infection, rVE  
239 of a primary vaccine series combined with prior infection was 79% (95% CI 69;85), rVE of booster dose  
240 without a prior infection was 47% (95% CI -21;77) and rVE of a booster dose combined with prior  
241 infection was 87% (95% CI 73;94) (Table 3).

### 242 *Change in VE by time since vaccination*

243 For the primary vaccine series, compared to unvaccinated HCWs, VE against symptomatic PCR-  
244 confirmed infection was 22% (95% CI -94;69) for participants who had received their second dose within  
245 14-179 days and 41% (95% CI -27;73) for those who had received their second doses  $\geq 180$  days. VE  
246 against PCR- or RAT-confirmed symptomatic SARS-CoV-2 infection was 33% (95% CI -57;72) within 14-  
247 179 days and 43% (95% CI -12;73)  $\geq 180$  days (Table 4).

248

## 249 Discussion

250 Using data from an ongoing cohort study of HCWs in Albania<sup>12,14</sup>, we found that COVID-19 booster dose  
251 VE against symptomatic SARS-CoV-2 infection during a period of Omicron BA.1 and BA.2 predominance  
252 was high, at 88%. Conversely, primary vaccine series VE was lower (34%) with low precision. In our  
253 cohort, only 17% of HCWs had received a booster dose at the end of the follow-up period, and as of  
254 mid-January 2023 only 20% of all HCWs in Albania had received a COVID-19 booster dose<sup>4</sup>. Our high  
255 booster VE findings, which to our knowledge reflect the first published booster dose VE results in  
256 Southeast Europe, provide evidence to support increased uptake of booster doses among HCWs in  
257 Albania.

258 The high booster dose VE against symptomatic infection, reflecting mainly BNT162b2 booster doses  
259 given within one month before the start of follow-up, is slightly higher than findings from studies in the  
260 United Kingdom<sup>11</sup> and Qatar<sup>19</sup>, which found recently administered BNT162b2 booster VE of 67% and  
261 52%, respectively, against symptomatic Omicron BA.1 and BA.2 infection, with confidence intervals that  
262 overlap with those from our study. We also found that rVE was 57% for booster dose compared to  
263 HCWs who had received the primary vaccine series a median time of 10 months prior to follow-up. The  
264 95% confidence intervals around rVE estimate were wide, with lower bounds that crossed zero. The  
265 limited precision of our VE estimates may reflect the relatively small number of events in this analysis.  
266 Studies of booster dose rVE against symptomatic Omicron infection in the US<sup>20</sup> and Qatar<sup>21</sup> found low to  
267 moderate VE, but rVE was much higher against severe outcomes such as hospitalization and death.

268 In our study, we found that primary vaccine series provided low VE (34%) against symptomatic Omicron  
269 infection, although precision was low due to small numbers. This estimate differs from the higher  
270 primary series VE estimate we previously found against symptomatic infection during a Delta-  
271 predominant period (67%) in the same cohort<sup>14</sup>. In our study, median time since receiving the second

272 dose was almost 10 months; therefore, in addition to the increased immune escape of Omicron, waning  
273 of vaccine immunity likely contributed to low primary series VE. Waning VE against symptomatic  
274 Omicron infection has been shown in other studies.<sup>9</sup> In the UK<sup>11</sup>, BNT162b2 VE dropped from 66% in the  
275 first month after completion of the primary series to 9% six months after. In our study, we could not  
276 observe significant waning primary series immunity, likely due to the low power secondary to the low  
277 number of events.

278

279 We found that VE was highest among individuals who were both boosted and had prior SARS-CoV-2  
280 infection. These findings are consistent with many published studies that have demonstrated the  
281 benefits of hybrid immunity,<sup>22</sup> and support the Albanian Ministry of Health and Social Protection  
282 recommendations that individuals should receive a primary vaccine series regardless of prior infection  
283 history, and that HCWs and other priority populations should receive a booster even if they were  
284 previously infected. This message is particularly important in the context of populations with high rates  
285 of previous infection; a study in the UK reported lower vaccine acceptance among individuals who were  
286 previously infected and thought the vaccine would no longer be useful<sup>23</sup>.

287 This study has several strengths. First, regular serological testing of HCWs allowed us to detect  
288 seroconversions, infer asymptomatic infections and estimate VE against any SARS-CoV-2 infection.  
289 Serology testing also increased our sensitivity in detecting prior infection. Additional strengths of the  
290 study are its prospective cohort design and the very high retention rate of the participants after one  
291 year of follow-up. Also, the completion rate of the weekly symptom questionnaire remained high during  
292 the follow-up period, and all participants with symptoms were tested for SARS-CoV-2.

293 Our study has several limitations. Due to the high coverage of the primary vaccine series in our cohort,  
294 only a small number of unvaccinated HCWs were available for a comparison group, and this group may  
295 have been different from vaccinated participants with respect to their exposures to SARS-CoV-2 and  
296 disease risk<sup>25</sup>. To overcome this limitation, we also calculated relative VE of booster dose compared to  
297 primary vaccine series. In addition, our study was not powered to estimate VE against severe but rare  
298 outcomes like hospitalisation or death. Other studies have shown high, durable primary series VE  
299 against severe outcomes during Omicron for BNT162b2<sup>9,10</sup>. Although we were able to detect prior  
300 infections through multiple testing platforms, we were not able to analyse time since previous infection.  
301 We could not confirm through WGS that all positive participants were infected with BA.1 or BA.2 SARS-  
302 CoV-2 Omicron sublineage. There were limited molecular surveillance data from Albania from the first  
303 two weeks of January 2022. Finally, because of the low number of events and the relatively low VE,  
304 some of our VE estimates had wide confidence intervals and overlapped zero.

305 In our cohort study of Albanian HCWs we found that a monovalent COVID-19 booster dose offered  
306 better protection against symptomatic SARS-CoV-2 infection compared to primary vaccine series during  
307 a period of BA.1/BA.2 Omicron circulation. These findings underscore the importance of the Albanian  
308 Ministry of Health and Social Protection recommendation that all HCWs should receive a booster dose  
309 six months following receipt of their primary vaccine series. Our results, which reflect the first locally  
310 generated booster VE data, could be communicated to Albanian HCWs in order to decrease vaccine  
311 complacency and increase booster uptake. Our findings could be further generalised and used to  
312 promote booster dose uptake among HCWs in neighbouring countries in Southeast Europe and in the  
313 general population, where booster uptake remains low.

314

315

316 *Acknowledgments*

317 Jörn Beheim-Schwarzbach, Victor M. Corman, and Terry C. Jones (Institute of Virology, Charité-  
318 Universitätsmedizin Berlin, corporate member of Freie Universität Berlin, Humboldt – Universität zu  
319 Berlin, and Berlin Institute of Health, Berlin, Germany; and German Centre for Infection Research (DZIF),  
320 partner site Charité, Berlin, Germany); Marta Valenciano and Alain Moren (Epiconcept, France).

321

### 322 *Disclaimer*

323 The findings and conclusions in this report are those of the author(s) and do not necessarily represent  
324 the views of the Centers for Disease Control and Prevention. The authors affiliated with the World  
325 Health Organization (WHO) are alone responsible for the views expressed in this publication and they do  
326 not necessarily represent the decisions or policies of the WHO.

### 327 *Author contributions*

328 SB, MAK and RP conceived the cohort study on which this analysis is based; IP, IH, JS, AF, RD, AV, MK,  
329 MAK, and SB planned and implemented the study, including development of study protocols, data  
330 quality checks and acquisition of data; IF, MAK, and SB conceived the article; IF drafted the manuscript  
331 and performed the literature search. MYRC performed the data analysis with support from EK. JS, MYRC,  
332 and EK directly accessed and verified the raw data and take responsibility for the integrity and accuracy  
333 of the analyses. IH, BM, and CD performed lab analysis of study samples. All authors contributed to the  
334 interpretation of the results and critically revised the manuscript. All authors had full access to all the  
335 data reported in the study and accept responsibility to submit the paper for publication.

336

### 337 *Financial statement*

338 This study was funded by Task Force for Global Health and World Health Organisation Regional Office  
339 for Europe.

340

341 Conflict of interest

342 None of the authors have conflict of interest.

343

344 This work has been presented as oral presentation at European Scientific Conference on Applied

345 Infectious Disease Epidemiology in November 2022, Stockholm, Sweden.



346 **References**

- 347 1 Gómez-Ochoa SA, Franco OH, Rojas LZ, *et al.* COVID-19 in Health-Care Workers: A Living  
348 Systematic Review and Meta-Analysis of Prevalence, Risk Factors, Clinical Characteristics, and  
349 Outcomes. *Am J Epidemiol* 2021; **190**: 161–75.
- 350 2 Smallwood N, Harrex W, Rees M, Willis K, Bennett CM. COVID-19 infection and the broader  
351 impacts of the pandemic on healthcare workers. *Respirology* 2022; **27**: 411–26.
- 352 3 Shah AS V, Gribben C, Bishop J, *et al.* Effect of Vaccination on Transmission of SARS-CoV-2. *N Engl*  
353 *J Med* 2021; **385**: 1718–20.
- 354 4 WHO Regional Office for Europe. WHO/Europe COVID-19 Vaccine Programme Monitor.  
355 [https://worldhealthorg.shinyapps.io/EURO\\_COVID-19\\_vaccine\\_monitor/](https://worldhealthorg.shinyapps.io/EURO_COVID-19_vaccine_monitor/).
- 356 5 International Vaccine Access Center (IVAC). Johns Hopkins Bloomberg School of Public Health,  
357 VIEW-hub. [www.view-hub.org](http://www.view-hub.org). (accessed Sept 2, 2023).
- 358 6 Clemens J, Aziz AB, Tadesse BT, Kang S, Marks F, Kim J. Evaluation of protection by COVID-19  
359 vaccines after deployment in low and lower-middle income countries. *eClinicalMedicine* 2022;  
360 **43**. DOI:10.1016/j.eclinm.2021.101253.
- 361 7 Lino A, Cardoso MA, Martins-Lopes P, Gonçalves HMR. Omicron – The new SARS-CoV-2  
362 challenge? *Rev Med Virol* 2022; **32**: 1–11.
- 363 8 Neville S, Dombey D, Ghiglione D. Omicron sparks European health staff shortages but spares  
364 ICUs. *Financ. Times*. 2022.
- 365 9 Higdon MM, Baidya A, Walter KK, *et al.* Duration of effectiveness of vaccination against COVID-19  
366 caused by the omicron variant. *Lancet Infect Dis* 2022; **22**: 1114–6.
- 367 10 Kirsebom FCM, Andrews N, Stowe J, *et al.* COVID-19 vaccine effectiveness against the omicron  
368 (BA.2) variant in England. *Lancet Infect Dis* 2022; **22**: 931–3.
- 369 11 Andrews N, Stowe J, Kirsebom F, *et al.* Covid-19 Vaccine Effectiveness against the Omicron  
370 (B.1.1.529) Variant. *N Engl J Med* 2022; **386**: 1532–46.
- 371 12 Sridhar S, Fico A, Preza I, *et al.* COVID-19 vaccine effectiveness among healthcare workers in  
372 Albania (COVE-AL): Protocol for a prospective cohort study and cohort baseline data. *BMJ Open*  
373 2022; **12**: 1–9.
- 374 13 Jorgensen P, Schmid A, Sulo J, *et al.* Factors associated with receipt of COVID-19 vaccination and  
375 SARS-CoV-2 seropositivity among healthcare workers in Albania (February 2021&#x2013;June  
376 2022): secondary analysis of a prospective cohort study. *Lancet Reg Heal – Eur* 2023; published  
377 online March 8. DOI:10.1016/j.lanepe.2023.100584.

- 378 14 Rubin-Smith J, Rojas Castro MY, Preza I, *et al.* Primary Series COVID-19 Vaccine Effectiveness  
379 Among Health Care Workers in Albania, February–December 2021. *Available SSRN*  
380 <https://ssrn.com/abstract=4282932> or <http://dx.doi.org/102139/ssrn4282932>.
- 381 15 Harris PA, Taylor R, Minor BL, *et al.* The REDCap consortium: Building an international community  
382 of software platform partners. *J Biomed Inform* 2019; **95**: 103208.
- 383 16 Shu Y, McCauley J. GISAID: Global initiative on sharing all influenza data – from vision to reality.  
384 *Eurosurveillance* 2017; **22**. DOI:<https://doi.org/10.2807/1560-7917.ES.2017.22.13.30494>.
- 385 17 Wajnberg A, Mansour M, Leven E, *et al.* Humoral response and PCR positivity in patients with  
386 COVID-19 in the New York City region, USA: an observational study. *The Lancet Microbe* 2020; **1**:  
387 e283–9.
- 388 18 R Foundation for Statistical Computing. R Core Team (2018). R: A language and environment for  
389 statistical computing. <https://www.r-project.org/>.
- 390 19 Chemaitelly H, Ayoub HH, AlMukdad S, *et al.* Duration of mRNA vaccine protection against SARS-  
391 CoV-2 Omicron BA.1 and BA.2 subvariants in Qatar. *Nat Commun* 2022; **13**: 1–12.
- 392 20 Butt AA, Talisa VB, Shaikh OS, Omer SB, Mayr FB. Relative Vaccine Effectiveness of a Severe Acute  
393 Respiratory Syndrome Coronavirus 2 Messenger RNA Vaccine Booster Dose Against the Omicron  
394 Variant. *Clin Infect Dis* 2022; **75**: 2161–8.
- 395 21 Abu-Raddad LJ, Chemaitelly H, Ayoub HH, *et al.* Effect of mRNA Vaccine Boosters against SARS-  
396 CoV-2 Omicron Infection in Qatar. *N Engl J Med* 2022; **386**: 1804–16.
- 397 22 Bobrovitz N, Ware H, Ma X, *et al.* Protective effectiveness of prior SARS-CoV-2 infection and  
398 hybrid immunity against Omicron infection and severe disease: a systematic review and meta-  
399 regression. *Lancet Infect Dis* 2023; **22**. DOI:10.1016/S1473-3099(22)00801-5.
- 400 23 Stead M, Jessop C, Angus K, *et al.* National survey of attitudes towards and intentions to  
401 vaccinate against COVID-19: implications for communications. *BMJ Open* 2021; **11**.  
402 DOI:10.1136/bmjopen-2021-055085.
- 403 24 Tsang NNY, So HC, Cowling BJ, Leung G, Ip DKM. Effectiveness of BNT162b2 and CoronaVac  
404 COVID-19 Vaccination Against Asymptomatic and Symptomatic Infection of SARS-CoV-2 Omicron  
405 BA.2 in Hong Kong. *SSRN Electron J* 2022; **3099**: 1–14.
- 406 25 World Health Organization. Evaluation of COVID-19 vaccine effectiveness in a changing landscape  
407 of COVID-19 epidemiology and vaccination. 2021  
408 [https://apps.who.int/iris/bitstream/handle/10665/363344/WHO-2019-nCoV-vaccine-](https://apps.who.int/iris/bitstream/handle/10665/363344/WHO-2019-nCoV-vaccine-effectiveness-VE-evaluations-2022.1-eng.pdf)  
409 [effectiveness-VE-evaluations-2022.1-eng.pdf](https://apps.who.int/iris/bitstream/handle/10665/363344/WHO-2019-nCoV-vaccine-effectiveness-VE-evaluations-2022.1-eng.pdf).

410

411

412 **Tables and figures**

413 **Table 1. Demographic and occupational characteristics of health care worker participants by**  
 414 **vaccination status on the first day of the follow-up period (n=1462), Albania, 2022**

| Characteristics                                                                       | All Participants<br>(n= 1462) | Unvaccinated<br>(n= 135) | Primary vaccine<br>series (n= 1112) | Booster vaccine<br>(n= 146) |
|---------------------------------------------------------------------------------------|-------------------------------|--------------------------|-------------------------------------|-----------------------------|
| <b>Age, in years, at start of person-time contribution</b>                            |                               |                          |                                     |                             |
| Median (IQR)                                                                          | 44 (34-53)                    | 35 (30-46)               | 44 (34-52)                          | 51 (42-57)                  |
| <b>Age group (in years) at start of person-time contribution</b>                      |                               |                          |                                     |                             |
| 20-29, n (%)                                                                          | 208 (14)                      | 28 (21)                  | 158 (14)                            | 6 (4)                       |
| 30-39, n (%)                                                                          | 381 (26)                      | 55 (41)                  | 281 (25)                            | 21 (14)                     |
| 40-49, n (%)                                                                          | 364 (25)                      | 21 (16)                  | 295 (27)                            | 40 (27)                     |
| 50-59, n (%)                                                                          | 407 (28)                      | 26 (19)                  | 310 (28)                            | 51 (35)                     |
| 60+, n (%)                                                                            | 102 (7)                       | 5 (4)                    | 68 (6)                              | 28 (19)                     |
| <b>Sex</b>                                                                            |                               |                          |                                     |                             |
| M, n (%)                                                                              | 311 (21)                      | 15 (11)                  | 223 (20)                            | 63 (43)                     |
| F, n (%)                                                                              | 1151 (79)                     | 120 (89)                 | 889 (80)                            | 83 (57)                     |
| <b>Hospital</b>                                                                       |                               |                          |                                     |                             |
| Tirana, n (%)                                                                         | 905 (62)                      | 91 (67)                  | 670 (60)                            | 94 (64)                     |
| Durres, n (%)                                                                         | 297 (20)                      | 18 (13)                  | 242 (22)                            | 33 (23)                     |
| Fier, n (%)                                                                           | 260 (18)                      | 26 (19)                  | 200 (18)                            | 19 (13)                     |
| <b>Any chronic condition*^</b>                                                        |                               |                          |                                     |                             |
| No, n (%)                                                                             | 1175 (80)                     | 117 (87)                 | 893 (80)                            | 105 (72)                    |
| Yes, n (%)                                                                            | 287 (20)                      | 18 (13)                  | 219 (20)                            | 41 (28)                     |
| <b>Occupation/Role in hospital*</b>                                                   |                               |                          |                                     |                             |
| Physician, n (%)                                                                      | 297 (20)                      | 15 (11)                  | 191 (17)                            | 82 (56)                     |
| Nurse or midwife, n (%)                                                               | 691 (47)                      | 64 (47)                  | 552 (50)                            | 49 (34)                     |
| Janitorial staff or food worker, n (%)                                                | 194 (13)                      | 15 (11)                  | 164 (15)                            | 6 (4)                       |
| Other, n (%)                                                                          | 280 (19)                      | 41 (30)                  | 205 (18)                            | 9 (6)                       |
| <b>Patient-facing role*</b>                                                           |                               |                          |                                     |                             |
| Yes, n (%)                                                                            | 1394 (95)                     | 120 (89)                 | 1064 (96)                           | 143 (98)                    |
| No, n (%)                                                                             | 68 (5)                        | 15 (11)                  | 48 (4)                              | 3 (2)                       |
| <b>Hands-on care*</b>                                                                 |                               |                          |                                     |                             |
| No, n (%)                                                                             | 582 (40)                      | 59 (44)                  | 431 (39)                            | 53 (36)                     |
| Yes, n (%)                                                                            | 880 (60)                      | 76 (56)                  | 681 (61)                            | 93 (64)                     |
| <b>Household size* (n=1407)</b>                                                       |                               |                          |                                     |                             |
| 1-3, n (%)                                                                            | 557 (40)                      | 55 (42)                  | 408 (38)                            | 66 (46)                     |
| 4-5, n (%)                                                                            | 733 (52)                      | 64 (49)                  | 571 (54)                            | 67 (47)                     |
| 6+, n (%)                                                                             | 117 (8)                       | 11 (8)                   | 88 (8)                              | 11 (8)                      |
| <b>COVID-19 vaccination status(n=1325)</b>                                            |                               |                          |                                     |                             |
| Unvaccinated, n (%)                                                                   | 135 (10)                      | 135 (100)                |                                     |                             |
| BNT162b2 - 1 dose, n (%)                                                              | 48 (4)                        |                          |                                     |                             |
| BNT162b2 - 2 dose, n (%)                                                              | 959 (72)                      |                          | 959 (86)                            |                             |
| BNT162b2 - 3 dose, n (%)                                                              | 143 (11)                      |                          |                                     | 143 (98)                    |
| ChAdOx-S – 2 dose, n (%)                                                              | 137 (9)                       |                          | 137 (12)                            |                             |
| CoronaVac - 2 doses, n (%)                                                            | 11 (<1)                       |                          | 11 (1)                              |                             |
| Other, n (%)                                                                          | 29 (2)                        |                          | 5 (<1)                              | 3 (2)                       |
| <b>Number of days between 2nd dose and start of person-time contribution (n=1258)</b> |                               |                          |                                     |                             |

|                                                                                                     |               |               |               |               |
|-----------------------------------------------------------------------------------------------------|---------------|---------------|---------------|---------------|
| Median (IQR)                                                                                        | 289 (210-294) |               | 289 (210-292) | 292 (288-296) |
| Number of days between 3rd dose and start of person-time contribution (n=146)                       |               |               |               |               |
| Median (IQR)                                                                                        | 30 (22-46)    |               |               | 30 (22-46)    |
| Previous Infection (PCR+, RAT+ or seroconversion)                                                   |               |               |               |               |
| No, n (%)                                                                                           | 155 (11)      | 8 (6)         | 114 (10)      | 29 (20)       |
| Yes, n (%)                                                                                          | 1307 (89)     | 127 (94)      | 998 (90)      | 117 (80)      |
| Time from ** previous infection (PCR+, RAT+, seroconversion) to start of follow-up period+ (n=1307) |               |               |               |               |
| No previous infection, n (%)                                                                        | 155 (11)      | 8 (6)         | 114 (10)      | 29 (20)       |
| Median number of days (IQR)                                                                         | 338 (313-379) | 325 (291-390) | 338 (316-375) | 339 (297-396) |
| <3 months, n (%)                                                                                    | 115 (8)       | 15 (11)       | 85 (8)        | 10 (7)        |
| 3-12 months, n(%)                                                                                   | 836 (57)      | 72 (53)       | 646 (58)      | 75 (51)       |
| 12 or more months, n (%)                                                                            | 356 (24)      | 40 (30)       | 267 (24)      | 32 (22)       |

415 \* Information collected at study enrolment (February-May 2021)  
 416 \*\*Onset of symptoms, swab date or inferred infection date to the start of person-time contribution  
 417 ^chronic conditions: diabetes, hypertension, immunosuppression, cancer, autoimmune disease, lung disease,  
 418 kidney disease, liver disease  
 419  
 420  
 421  
 422

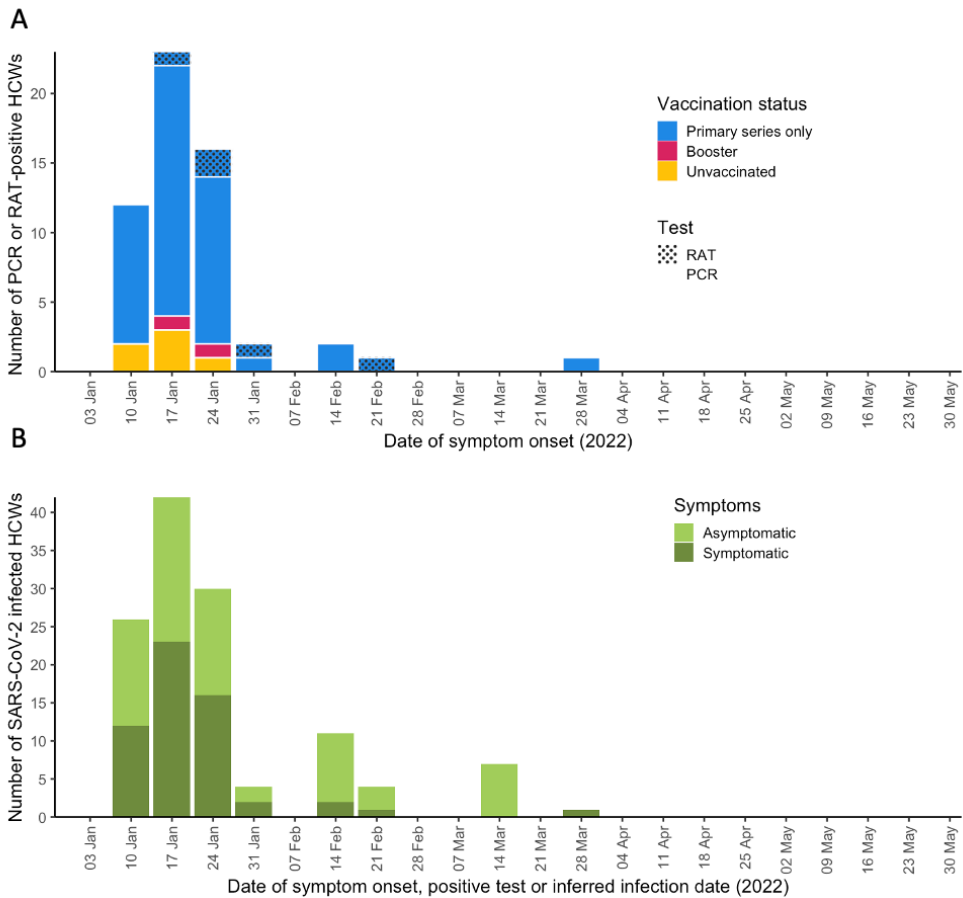

423  
 424  
 425  
 426 **Figure 1. SARS-CoV-2 infections among HCWs by week, January 1 – May 31, 2022**

427 A – Symptomatic SARS-CoV-2 infections stratified by vaccination status and type of confirmatory test, by week; B –  
 428 all SARS-CoV-2 infections stratified by presence of symptoms, by week  
 429  
 430  
 431  
 432  
 433

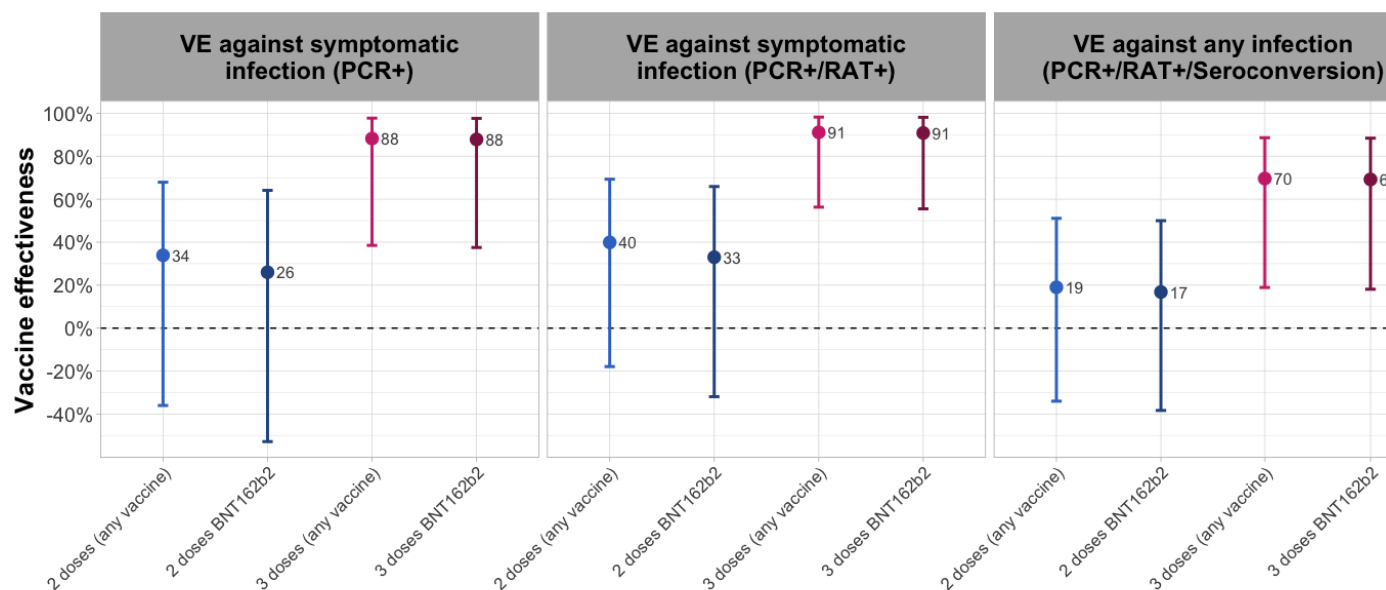

434  
 435 **Figure 2. COVID-19 vaccine effectiveness estimates of primary vaccine series and booster dose against**  
 436 **PCR-confirmed symptomatic SARS-CoV-2 infection (left), PCR- or RAT-confirmed symptomatic SARS-**  
 437 **CoV-2 infection (middle) and any (asymptomatic or symptomatic) SARS-CoV-2 infection confirmed by**  
 438 **PCR, RAT or seroconversion (right)**  
 439 Dot – point estimate; lines – 95% confidence interval; blue – Primary series VE; violet – booster dose VE

**Table 2. COVID-19 vaccine effectiveness of primary vaccine series and booster dose against SARS-CoV-2 infection during a period of Omicron (BA.1 and BA.2) predominance, and relative vaccine effectiveness of booster dose compared to primary vaccine series, Albania, January 1 – May 31, 2022**

|                                                     |             |                              | Number of HCWs | Total person-time (days) | PCR-confirmed infection | RAT-confirmed infection | Sero-conversion | All infections | Unadjusted HR (95% CI) | Adjusted HR**(95% CI) | VE (95% CI)  |
|-----------------------------------------------------|-------------|------------------------------|----------------|--------------------------|-------------------------|-------------------------|-----------------|----------------|------------------------|-----------------------|--------------|
| <b>Primary vaccine series vaccine effectiveness</b> |             |                              |                |                          |                         |                         |                 |                |                        |                       |              |
| Symptomatic infection                               | PCR         | Unvaccinated                 | 130            | 12736                    | 10                      |                         |                 | 10             | Ref                    | Ref                   | Ref          |
|                                                     |             | Primary series - any vaccine | 1124           | 139274                   | 62                      |                         |                 | 62             | 0.68 (0.35; 1.32)      | 0.66 (0.32; 1.36)     | 34 (-36; 68) |
|                                                     |             | Unvaccinated                 | 130            | 60745                    | 10                      |                         |                 | 10             | Ref                    | Ref                   | Ref          |
|                                                     | PCR and RAT | Primary series - BNT162b2    | 972            | 521880                   | 57                      |                         |                 | 57             | 0.75 (0.38; 1.47)      | 0.74 (0.36; 1.53)     | 26 (-53; 64) |
|                                                     |             | Unvaccinated                 | 130            | 12736                    | 10                      | 2                       |                 | 12             | Ref                    | Ref                   | Ref          |
|                                                     |             | Primary series - any vaccine | 1124           | 139274                   | 62                      | 8                       |                 | 70             | 0.62 (-0.34; 1.16)     | 0.60 (0.31; 11.8)     | 40 (-18; 69) |
| Any infection                                       | PCR and RAT | Unvaccinated                 | 130            | 12736                    | 10                      | 2                       |                 | 12             | Ref                    | Ref                   | Ref          |
|                                                     |             | Primary series - any vaccine | 1124           | 139274                   | 62                      | 8                       |                 | 70             | 0.62 (-0.34; 1.16)     | 0.60 (0.31; 11.8)     | 40 (-18; 69) |
|                                                     |             | Unvaccinated                 | 130            | 12736                    | 10                      | 2                       |                 | 12             | Ref                    | Ref                   | Ref          |
|                                                     |             | Primary series - BNT162b2    | 972            | 119852                   | 57                      | 8                       |                 | 65             | 0.69 (0.37; 1.29)      | 0.67 (0.34; 1.32)     | 33 (-32; 66) |
| Any infection                                       | PCR and RAT | Unvaccinated                 | 129            | 12102                    | 10                      | 3                       | 6               | 19             | Ref                    | Ref                   | Ref          |
|                                                     |             | Primary series - any vaccine | 1108           | 128525                   | 63                      | 11                      | 82              | 156            | 0.86 (0.53; 1.39)      | 0.81 (0.49; 1.34)     | 19 (-34; 51) |
|                                                     |             | Unvaccinated                 | 129            | 12102                    | 10                      | 3                       | 6               | 19             | Ref                    | Ref                   | Ref          |
|                                                     |             | Primary series - BNT162b2    | 972            | 112800                   | 59                      | 10                      | 66              | 135            | 0.86 (0.53; 1.40)      | 0.83 (0.50; 1.38)     | 17 (-38; 50) |
| <b>Booster dose vaccine effectiveness</b>           |             |                              |                |                          |                         |                         |                 |                |                        |                       |              |
| Symptomatic infection                               | PCR         | Unvaccinated                 | 130            | 12736                    | 10                      |                         |                 | 10             | Ref                    | Ref                   | Ref          |
|                                                     |             | Booster dose - any vaccine   | 240            | 29219                    | 4                       |                         |                 | 4              | 0.27 (0.08; 0.91)      | 0.12 (0.02; 0.62)     | 88 (39; 98)  |
|                                                     |             | Unvaccinated                 | 130            | 12736                    | 10                      |                         |                 | 10             | Ref                    | Ref                   | Ref          |
|                                                     | PCR and RAT | Booster dose - BNT162b2      | 221            | 27343                    | 4                       |                         |                 | 4              | 0.28 (0.08; 0.95)      | 0.12 (0.02; 0.63)     | 88 (38; 98)  |
|                                                     |             | Unvaccinated                 | 130            | 12736                    | 10                      | 2                       |                 | 12             | Ref                    | Ref                   | Ref          |
|                                                     |             | Booster dose - any vaccine   | 240            | 29219                    | 4                       | 0                       |                 | 4              | 0.22 (0.07; 0.72)      | 0.09 (0.02; 0.44)     | 91 (56; 98)  |
| Any infection                                       | PCR and RAT | Unvaccinated                 | 130            | 12736                    | 10                      | 2                       |                 | 12             | Ref                    | Ref                   | Ref          |
|                                                     |             | Booster dose - BNT162b2      | 221            | 27343                    | 4                       | 0                       |                 | 4              | 0.23 (0.07; 0.75)      | 0.09 (0.02; 0.45)     | 91 (56; 98)  |
|                                                     |             | Unvaccinated                 | 129            | 57322                    | 10                      | 3                       | 6               | 19             | Ref                    | Ref                   | Ref          |
|                                                     |             | Booster dose - any vaccine   | 228            | 118247                   | 5                       | 0                       | 13              | 18             | 0.55 (0.28; 1.10)      | 0.30 (0.11; 0.81)     | 70 (19; 89)  |
| Any infection                                       | PCR and RAT | Unvaccinated                 | 129            | 57322                    | 10                      | 3                       | 6               | 19             | Ref                    | Ref                   | Ref          |
|                                                     |             | Booster dose - BNT162b2      | 215            | 115050                   | 5                       | 0                       | 13              | 18             | 0.57 (0.29; 1.13)      | 0.31 (0.12; 0.82)     | 69 (18; 88)  |
| <b>Relative vaccine effectiveness*</b>              |             |                              |                |                          |                         |                         |                 |                |                        |                       |              |
| Symptomatic infection                               | PCR         | Primary series - any vaccine | 1110           | 541839                   | 51                      |                         |                 | 51             | Ref                    | Ref                   | Ref          |
|                                                     |             | Booster dose - any vaccine   | 240            | 130487                   | 4                       |                         |                 | 4              | 0.46 (0.16; 1.29)      | 0.44 (0.15; 1.25)     | 57 (-25; 85) |
|                                                     |             | Primary series - BNT162b2    | 955            | 113450                   | 45                      |                         |                 | 45             | Ref                    | Ref                   | Ref          |
|                                                     |             | Booster dose - BNT162b2      | 221            | 27343                    | 4                       |                         |                 | 4              | 0.46 (0.16; 1.31)      | 0.44 (0.15; 1.28)     | 56 (-28; 85) |
|                                                     | PCR and RAT | Primary series - any vaccine | 955            | 488719                   | 51                      | 8                       |                 | 59             | Ref                    | Ref                   | Ref          |
|                                                     |             | Booster dose - any vaccine   | 221            | 125319                   | 4                       | 0                       |                 | 4              | 0.40 (0.14; 1.12)      | 0.39 (0.14; 1.11)     | 61 (-11; 86) |
|                                                     |             | Primary series - BNT162b2    | 955            | 488719                   | 45                      | 8                       |                 | 53             | Ref                    | Ref                   | Ref          |
|                                                     |             | Booster dose - BNT162b2      | 221            | 125319                   | 4                       | 0                       |                 | 4              | 0.40 (0.14; 1.13)      | 0.39 (0.14; 1.12)     | 61 (-12; 86) |
| Any infection                                       | PCR and RAT | Primary series - any vaccine | 1083           | 120282                   | 51                      | 11                      | 76              | 138            | Ref                    | Ref                   | Ref          |
|                                                     |             | Booster dose - any vaccine   | 228            | 26621                    | 5                       | 0                       | 13              | 18             | 0.71 (0.43; 1.17)      | 0.64 (0.38; 1.07)     | 36 (-7; 62)  |
|                                                     |             | Primary series - BNT162b2    | 946            | 106021                   | 46                      | 10                      | 62              | 118            | Ref                    | Ref                   | Ref          |

|                         |     |       |   |   |    |    |                   |                   |              |
|-------------------------|-----|-------|---|---|----|----|-------------------|-------------------|--------------|
| Booster dose - BNT162b2 | 215 | 25308 | 5 | 0 | 13 | 18 | 0.77 (0.47; 1.27) | 0.70 (0.41; 1.18) | 30 (-18; 59) |
|-------------------------|-----|-------|---|---|----|----|-------------------|-------------------|--------------|

\*Participants eligible for booster dose

\*\*HR were adjusted for: hospital site, time since previous infection, age, sex and household size

446

**Table 3. Relative Vaccine effectiveness of booster dose compared to primary vaccine series against any SARS-CoV-2 infection during a period of Omicron (BA.1 and BA.2) predominance, stratified by previous COVID-19 infection, Albania, January 1 – May 31, 2022**

|                                                  | Number of HCWs | Total person-time (days) | PCR-confirmed infection | RAT-confirmed infection | Sero-conversion | All infections | Unadjusted HR (95% CI) | Adjusted HR (95% CI) | VE in % (95% CI) |
|--------------------------------------------------|----------------|--------------------------|-------------------------|-------------------------|-----------------|----------------|------------------------|----------------------|------------------|
| <b>Any vaccine*</b>                              |                |                          |                         |                         |                 |                |                        |                      |                  |
| Vaccinated (2 dose - only)/no previous infection | 110            | 9605                     | 7                       | 1                       | 36              | 44             | Ref                    | Ref                  | Ref              |
| Vaccinated (2 dose - only)/previous infection    | 973            | 110677                   | 44                      | 10                      | 40              | 94             | 0.22 (0.16; 0.32)      | 0.21 (0.15; 0.31)    | 79 (69; 85)      |
| Vaccinated (3 dose)/no previous infection        | 34             | 3899                     | 1                       | 0                       | 7               | 8              | 0.51 (0.23; 1.09)      | 0.53 (0.23; 1.21)    | 47 (-21; 77)     |
| Vaccinated (3 dose)/previous infection           | 194            | 22722                    | 4                       | 0                       | 6               | 10             | 0.13 (0.06; 0.27)      | 0.13 (0.06; 0.27)    | 87 (73; 94)      |
| <b>BNT162b2*</b>                                 |                |                          |                         |                         |                 |                |                        |                      |                  |
| Vaccinated (2 dose - only)/no previous infection | 93             | 8511                     | 5                       | 1                       | 28              | 34             | Ref                    | Ref                  | Ref              |
| Vaccinated (2 dose - only)/previous infection    | 853            | 97510                    | 41                      | 9                       | 34              | 84             | 0.25 (0.17; 0.38)      | 0.25 (0.17; 0.37)    | 75 (63; 83)      |
| Vaccinated (3 dose)/no previous infection        | 33             | 3774                     | 1                       | 0                       | 7               | 8              | 0.61 (0.27; 1.35)      | 0.64 (0.27; 1.50)    | 36 (-50; 73)     |
| Vaccinated (3 dose)/previous infection           | 182            | 21534                    | 4                       | 0                       | 6               | 10             | 0.16 (0.07; 0.35)      | 0.16 (0.07; 0.36)    | 84 (64; 93)      |

HR were adjusted for: hospital site, age and sex

**Table 4. Vaccine effectiveness against SARS-CoV-2 infection during a period of Omicron (BA.1 and BA.2) predominance by time since receiving primary vaccine series, Albania, January 1 – May 31, 2022**

|                                                                                          | Number of HCWs | Total person-time (days) | PCR-confirmed infection | RAT-confirmed infection | All infections | Unadjusted HR % (95%CI) | Adjusted HR % (95%CI) | Adjusted VE % (95%CI) |
|------------------------------------------------------------------------------------------|----------------|--------------------------|-------------------------|-------------------------|----------------|-------------------------|-----------------------|-----------------------|
| <b>Symptomatic SARS-CoV-2-infections detected by PCR by time since vaccination</b>       |                |                          |                         |                         |                |                         |                       |                       |
| Unvaccinated                                                                             | 130            | 12736                    | 10                      |                         | 10             | Ref                     | Ref                   | Ref                   |
| 2nd dose 14-179 days ago (any vaccine)                                                   | 239            | 19124                    | 13                      |                         | 13             | 0.92 (0.39; 2.19)       | 0.78 (0.31; 1.94)     | 22 (-94; 69)          |
| 2nd dose 180+ days ago (any vaccine)                                                     | 1018           | 120150                   | 49                      |                         | 49             | 0.64 (0.31; 1.35)       | 0.59 (0.27; 1.27)     | 42 (-27; 73)          |
| <b>Symptomatic SARS-CoV-2 infection detected by PCR or RAT by time since vaccination</b> |                |                          |                         |                         |                |                         |                       |                       |
| Unvaccinated                                                                             | 130            | 12736                    | 10                      | 2                       | 12             | Ref                     | Ref                   | Ref                   |
| 2nd dose 14-179 days ago (any vaccine)                                                   | 239            | 14031                    | 13                      | 0                       | 13             | 0.76 (0.33; 1.73)       | 0.67 (0.28; 1.57)     | 34 (-57; 72)          |
| 2nd dose 180+ days ago (any vaccine)                                                     | 1018           | 105821                   | 49                      | 8                       | 57             | 0.59 (0.32; 1.12)       | 0.57 (0.27; 1.13)     | 43 (-13; 73)          |

HR were adjusted for: hospital site, previous infection, age and sex
